# Supplementary material for: Investigation of Li-rich manganese oxide spinel structures for electrochemical water oxidation catalysis
Source: Royal Society of Chemistry journal article supplement (doi:10.1039/d2dt01964g), 2022-01-01
Supplement: d2dt01964g1.pdf [file d2dt01964g1.pdf]

# Supporting information

## Investigation of Li-excess Manganese Oxide Spinel Structure for Electrochemical Water Oxidation Catalysis

Deepika Tavar<sup>a,b</sup>, Kamlesh<sup>a,b</sup>, Satya Prakash<sup>a,b</sup>, Mohammad Ashiq<sup>a,b</sup>, Pradeep Singh<sup>c</sup>, Pankaj Raizada<sup>c</sup>, R.K.  
Sharma<sup>d</sup>, A.K.Srivastava<sup>a,b</sup>, Archana Singh<sup>a,b,\*</sup>,

<sup>a</sup>Academy of Scientific & Innovative Research (AcSIR), Ghaziabad 201002, India

<sup>b</sup>CSIR– Advanced Material and Processes Research Institute, Bhopal 462026, India

<sup>c</sup>School of Chemistry, Faculty of Basic Sciences, Shoolini University, Solan (HP), India—173229

<sup>d</sup>Raja Ramanna Research Center, Indore, India

\*[archanasingh@ampri.res.in](mailto:archanasingh@ampri.res.in)

**Table S1.** Rietveld refined Structural parameter of  $\text{Li}_4\text{Mn}_5\text{O}_{12}$ ,  $\text{LiMn}_2\text{O}_4$ ,  $\lambda\text{-MnO}_2$ 

|                                       | Atoms                                                           | Site | x       | y       | z       |
|---------------------------------------|-----------------------------------------------------------------|------|---------|---------|---------|
| $\lambda\text{MnO}_2$                 | Mn1                                                             | 16d  | 0.5     | 0.5     | 0.5     |
|                                       | O1                                                              | 32e  | 0.26339 | 0.26339 | 0.26339 |
|                                       | a=8.0568, cell volume=522.983,<br>Rp=31.2%, Rwp=19.3%, GOF=1.61 |      |         |         |         |
| $\text{LiMn}_2\text{O}_4$             | Li1                                                             | 8a   | 0.125   | 0.125   | 0.125   |
|                                       | Mn1                                                             | 16d  | 0.5     | 0.5     | 0.5     |
|                                       | O1                                                              | 32e  | 0.264   | 0.264   | 0.264   |
|                                       | a=8.1851, cell volume=548.367,<br>Rp=15.04%, Rwp=22%, GOF=2.13  |      |         |         |         |
| $\text{Li}_4\text{Mn}_5\text{O}_{12}$ | Li                                                              | 16d  | 0.0     | 0.0     | 0.0     |
|                                       | L1                                                              | 8a   | 0.37500 | 0.37500 | 0.37500 |
|                                       | Mn                                                              | 16d  | 0.0     | 0.0     | 0.0     |
|                                       | Mn                                                              | 8a   | 0.37500 | 0.37500 | 0.37500 |
|                                       | O                                                               | 32e  | 0.24680 | 0.24680 | 0.24680 |
|                                       | a=8.1377, cell volume=538.896,<br>Rp=5.07%, Rwp=2.73%, GOF=1.78 |      |         |         |         |

**Table S2.** ICP-MS analysis result for the  $\text{Li}_4\text{Mn}_5\text{O}_{12}$ ,  $\text{LiMn}_2\text{O}_4$ . The amounts of Li and Mn shown below are in gram obtained for 1 g of  $\text{Li}_4\text{Mn}_5\text{O}_{12}$ ,  $\text{LiMn}_2\text{O}_4$ .

| Li/Mn(molar ratio) | Prepared using $\gamma\text{-MnOOH}$ in $\text{LiNO}_3$ medium $\text{Li}_4\text{Mn}_5\text{O}_{12}$ |       | Prepared using $\gamma\text{-MnOOH}$ in $\text{LiOH}$ medium $\text{LiMn}_2\text{O}_4$ |        |
|--------------------|------------------------------------------------------------------------------------------------------|-------|----------------------------------------------------------------------------------------|--------|
|                    | Li                                                                                                   | Mn    | Li                                                                                     | Mn     |
| 1:1                | 0.047                                                                                                | 0.682 | 0.051                                                                                  | 0.7931 |

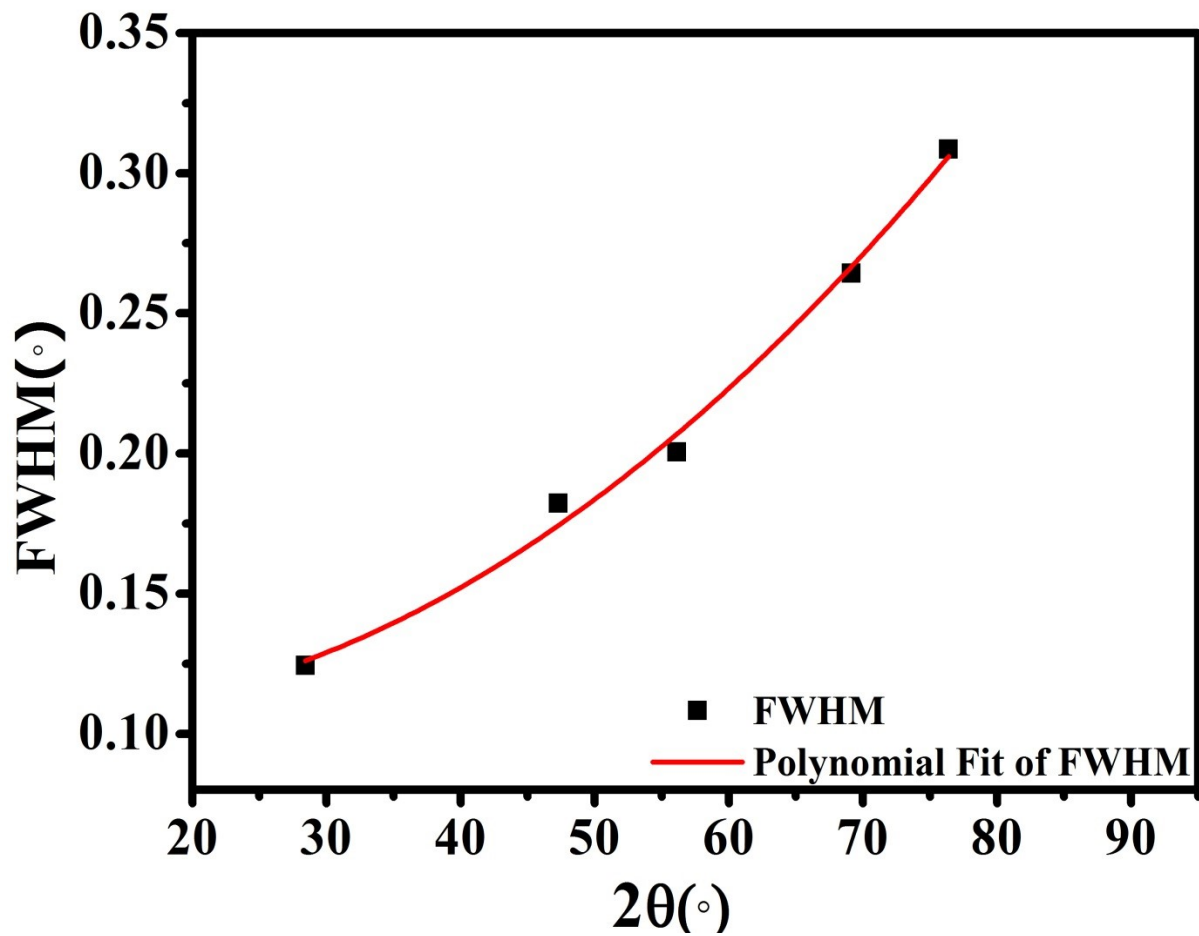

Fig. S0. Instrumental broadening against  $2\theta$  for standard Silicon powder

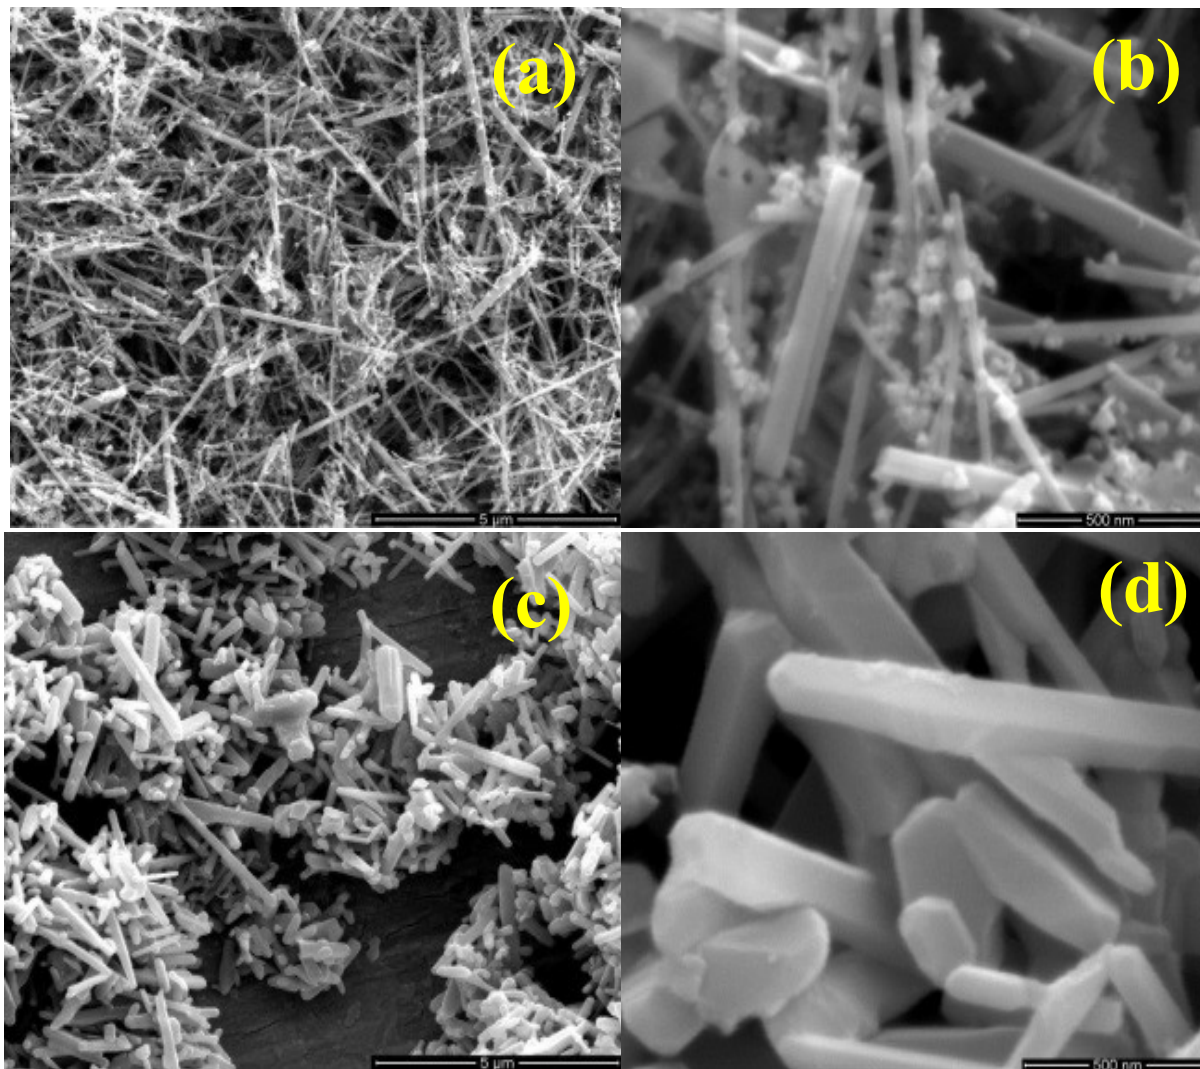

**Fig. S1.** SEM images of (a)  $\text{Li}_4\text{Mn}_5\text{O}_{12}$  at  $5\mu\text{m}$ , (b)  $\text{Li}_4\text{Mn}_5\text{O}_{12}$  at  $500\text{nm}$ , (c)  $\text{LiMn}_2\text{O}_4$  at  $5\mu\text{m}$  and (d)  $\text{LiMn}_2\text{O}_4$  at  $500\text{nm}$ .

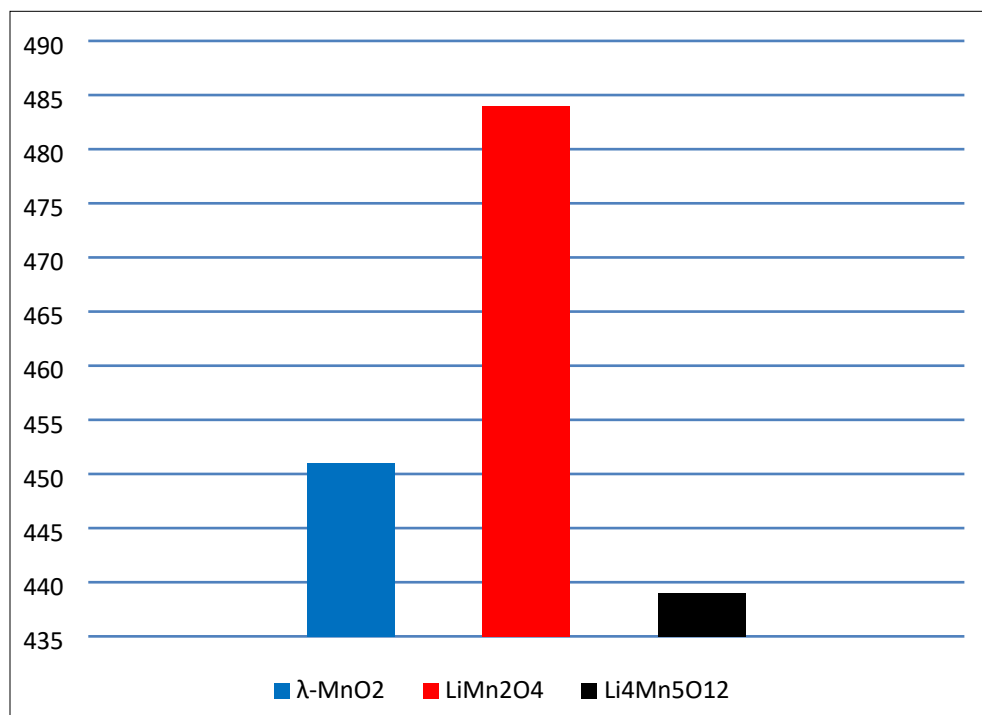

**Fig. S2.** Overpotential at Current density 5mA/cm<sup>2</sup>

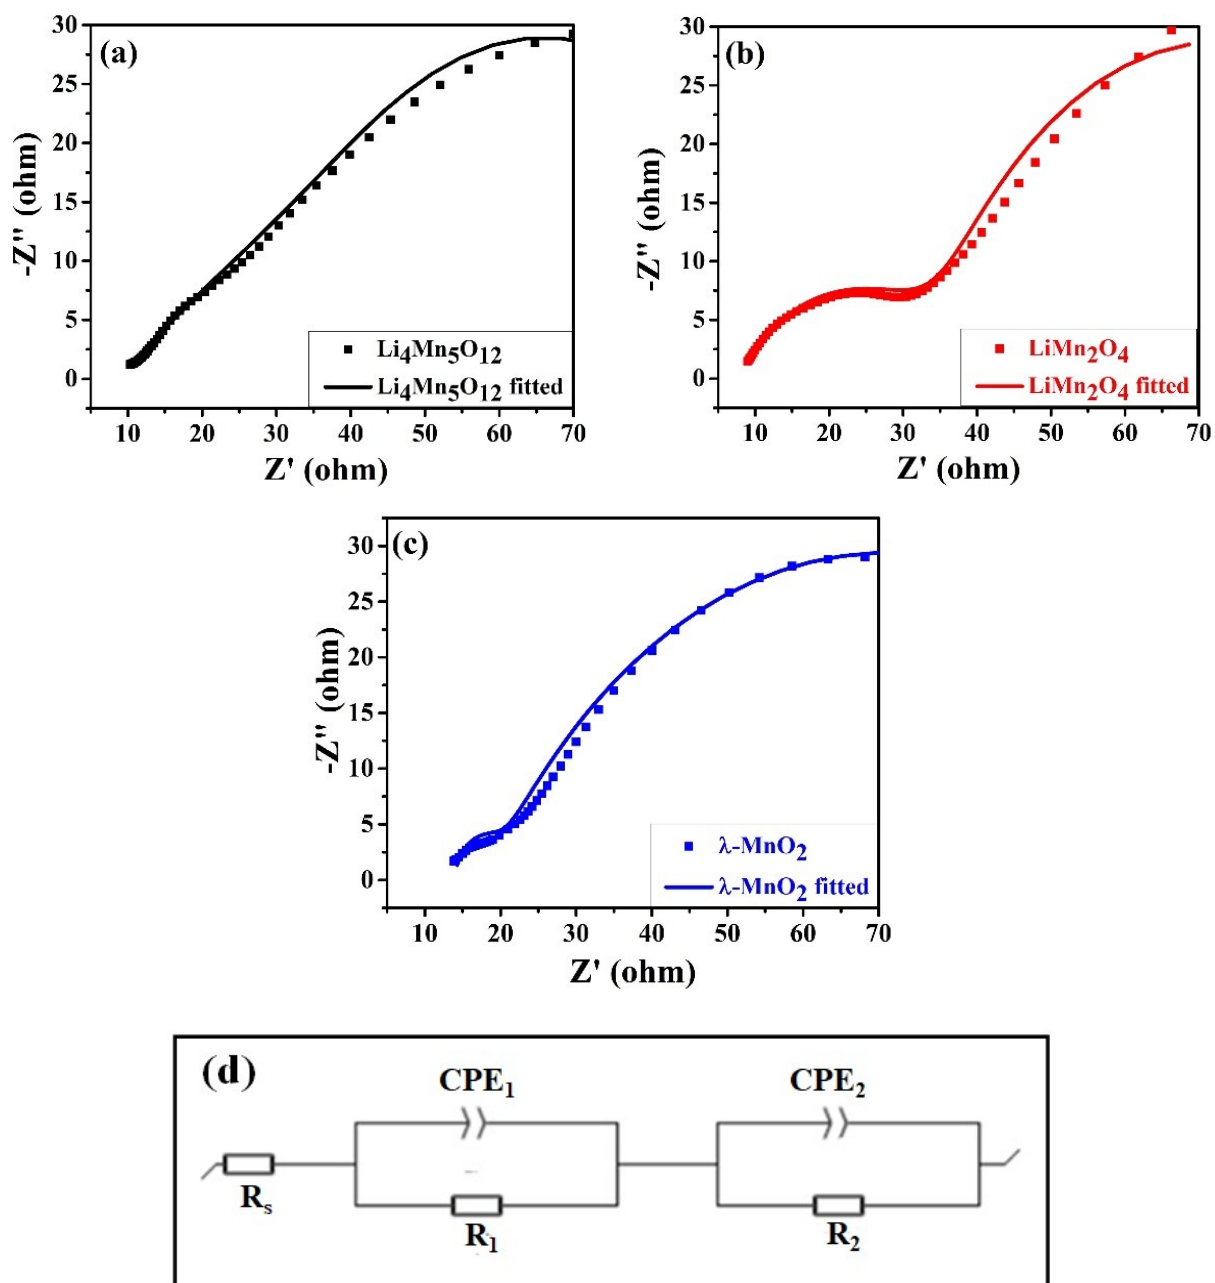

Fig. S3. Nyquist plots of (a)  $\text{Li}_4\text{Mn}_5\text{O}_{12}$ , (b)  $\text{LiMn}_2\text{O}_4$ , (c)  $\lambda\text{-MnO}_2$  and (d) equivalent circuit.

**Table S3.** XPS Mn2p peak data of Li<sub>4</sub>Mn<sub>5</sub>O<sub>12</sub>, LiMn<sub>2</sub>O<sub>4</sub> and λ-MnO<sub>2</sub> before testing

| Compound                                        | Binding energy position<br>(eV) |                  | Cation distribution  |                      | Mn valence |
|-------------------------------------------------|---------------------------------|------------------|----------------------|----------------------|------------|
|                                                 | Mn <sup>4+</sup>                | Mn <sup>3+</sup> | Mn <sup>4+</sup> (%) | Mn <sup>3+</sup> (%) |            |
| Li <sub>4</sub> Mn <sub>5</sub> O <sub>12</sub> | 642.8                           | 642.0            | 84.95%               | 15.05%               | +3.84      |
| LiMn <sub>2</sub> O <sub>4</sub>                | 642.2                           | 641.2            | 50.24%               | 49.76%               | +3.5       |
| λ-MnO <sub>2</sub>                              | 642.2                           | 641.9            | 87.14%               | 12.86%               | +3.84      |

**Table S4.** XPS Mn2p peak data of Li<sub>4</sub>Mn<sub>5</sub>O<sub>12</sub> after testing

| Compound                                        | Binding energy position<br>(eV) |                  | Cation distribution  |                      | Mn valence |
|-------------------------------------------------|---------------------------------|------------------|----------------------|----------------------|------------|
|                                                 | Mn <sup>4+</sup>                | Mn <sup>3+</sup> | Mn <sup>4+</sup> (%) | Mn <sup>3+</sup> (%) |            |
| Li <sub>4</sub> Mn <sub>5</sub> O <sub>12</sub> | 641.8                           | 640.78           | 91.78%               | 8.22                 | +3.91      |

**Table S5.** XPS peak fitting results of O1s core levels of Li<sub>4</sub>Mn<sub>5</sub>O<sub>12</sub>, LiMn<sub>2</sub>O<sub>4</sub> and λ-MnO<sub>2</sub> before testing.

| Spinel oxide                                    | O <sup>2-</sup> [%] | O <sub>2</sub> <sup>2-</sup> /O <sup>-</sup> [%] | OH <sup>-</sup> [%] | H <sub>2</sub> O [%] |
|-------------------------------------------------|---------------------|--------------------------------------------------|---------------------|----------------------|
| Li <sub>4</sub> Mn <sub>5</sub> O <sub>12</sub> | 23.43               | 50.06                                            | 24.09               | 2.43                 |
| LiMn <sub>2</sub> O <sub>4</sub>                | 25.87               | 15.83                                            | 53.74               | 4.56                 |
| λ-MnO <sub>2</sub>                              | 6.20                | 32.33                                            | 37.89               | 23.58                |

**Table S6.** XPS peak fitting results of O1<sub>s</sub> core levels of Li<sub>4</sub>Mn<sub>5</sub>O<sub>12</sub> after testing

| <b>Spinel oxide</b>                             | <b>O<sup>2-</sup> [%]</b> | <b>O<sub>2</sub><sup>2-</sup>/O<sup>-</sup> [%]</b> | <b>OH<sup>-</sup> [%]</b> | <b>H<sub>2</sub>O [%]</b> |
|-------------------------------------------------|---------------------------|-----------------------------------------------------|---------------------------|---------------------------|
| Li <sub>4</sub> Mn <sub>5</sub> O <sub>12</sub> | 13.66                     | 53.40                                               | 25.27                     | 7.67                      |



**Table S7:** Comparison of Turn over frequency (TOF) number for various Mn-O based catalyst (mol O<sub>2</sub>/s/mol)

| Compound                                                                                 | TOF (s <sup>-1</sup> ) | pH  | BET (m <sup>2</sup> g <sup>-1</sup> ) | Ref |
|------------------------------------------------------------------------------------------|------------------------|-----|---------------------------------------|-----|
| α-MnO <sub>2</sub>                                                                       | 1×10 <sup>-5</sup>     | 7   | 62                                    | [1] |
| λ-MnO <sub>2</sub> (HT)                                                                  | 5×10 <sup>-6</sup>     | 7   | -                                     | [2] |
| λ-MnO <sub>2</sub> (LT)                                                                  | 3×10 <sup>-5</sup>     | 7   | -                                     | [2] |
| δ-MnO <sub>2</sub>                                                                       | 2×10 <sup>-5</sup>     | 7   | 96                                    | [3] |
| MnO <sub>x</sub> (amorphous)                                                             | 5.5×10 <sup>-5</sup>   | 7.2 | 88                                    | [4] |
| MnO                                                                                      | 2×10 <sup>-5</sup>     | 7   | 11                                    | [5] |
| Mn <sub>2</sub> O <sub>3</sub> (bixbyite)                                                | 3.7×10 <sup>-4</sup>   | 7   | 16.27                                 | [6] |
| Mn <sub>3</sub> O <sub>4</sub>                                                           | 3×10 <sup>-4</sup>     | 7   | 14                                    | [4] |
| δ-MnO <sub>2</sub> -Mn <sub>3</sub> O <sub>4</sub><br>nanocomposite(MnO <sub>x</sub> -2) | 9.3×10 <sup>-4</sup>   | 5.8 | 112                                   | [3] |
| K <sub>0.16</sub> MnO <sub>1.97</sub> ·0.14H <sub>2</sub> O<br>(cryptomelane)            | 5.3×10 <sup>-5</sup>   | 5-6 | 140                                   | [4] |
| LiMn <sub>2</sub> O <sub>4</sub> (spinel)                                                | LOD*                   | 7   | 24.5                                  | [6] |

\*LOD = 0.05 nmol O<sub>2</sub> s<sup>-1</sup>

## References

- [1] D. Hong, Y. Yamada, A. Nomura, S. Fukuzumi, Catalytic activity of NiMnO<sub>3</sub> for visible light-driven and electrochemical water oxidation, *Physical Chemistry Chemical Physics*, 15 (2013) 19125-19128.
- [2] D.M. Robinson, Y.B. Go, M. Greenblatt, G.C. Dismukes, Water oxidation by λ-MnO<sub>2</sub>: catalysis by the cubical Mn<sub>4</sub>O<sub>4</sub> subcluster obtained by delithiation of spinel LiMn<sub>2</sub>O<sub>4</sub>, *Journal of the American Chemical Society*, 132 (2010) 11467-11469.
- [3] Z. Geng, Y. Wang, J. Liu, G. Li, L. Li, K. Huang, L. Yuan, S. Feng, δ-MnO<sub>2</sub>-Mn<sub>3</sub>O<sub>4</sub> nanocomposite for photochemical water oxidation: Active structure stabilized in the interface, *ACS Applied Materials & Interfaces*, 8 (2016) 27825-27831.
- [4] A. Iyer, J. Del-Pilar, C.K. King'andu, E. Kissel, H.F. Garces, H. Huang, A.M. El-Sawy, P.K. Dutta, S.L. Suib, Water oxidation catalysis using amorphous manganese oxides, octahedral molecular sieves (OMS-2), and octahedral layered (OL-1) manganese oxide structures, *The Journal of Physical Chemistry C*, 116 (2012) 6474-6483.
- [5] P.W. Menezes, A. Indra, P. Littlewood, M. Schwarze, C. Göbel, R. Schomäcker, M. Driess, Nanostructured manganese oxides as highly active water oxidation catalysts: a boost from manganese precursor chemistry, *ChemSusChem*, 7 (2014) 2202-2211.

[6] D.M. Robinson, Y.B. Go, M. Mui, G. Gardner, Z. Zhang, D. Mastrogiovanni, E. Garfunkel, J. Li, M. Greenblatt, G.C. Dismukes, Photochemical water oxidation by crystalline polymorphs of manganese oxides: structural requirements for catalysis, *Journal of the American chemical Society*, 135 (2013) 3494-3501.
